# Supplementary material for: Changes in serum amino acid levels in non-small cell lung cancer: a case-control study in Chinese population
Source: PeerJ. 2022 Apr 20;10:e13272. doi: 10.7717/peerj.13272 (PMC9034703; doi:10.7717/peerj.13272)
Supplement: Supplemental Information 6 [file peerj-10-13272-s006.xlsx]

## Sheet: Raw data
Serial number	Groop	Gender	Age	Hight（cm）	Weight（kg）	BMI	Smoking	Drinking	Histologic type of cancer	TNM stage	Phe	Trp	Ile	Leu	Met	Lys	Val	Thr	Gly	Ser	Asn	Asp	Cys	Gln	Glu	His	Pro	Arg	Tyr	Ala	Orn	Cit
1	1	1	51	163.03	82	30.8517	1	1	1	3	353	152	236	501	75.9	591	675	348	954	760	180	171	59.3	959	293	232	595	371	118	1040	316	56.6
2	1	1	56	163.19	70	26.2852	1	2	1	3	344	216	290	577	88.3	676	997	355	1150	540	192	182	126	1080	312	245	557	346	168	1430	250	69.1
3	1	1	59	160.92	65	25.1011	1	1	2	2	340	114	217	401	58.1	441	545	374	801	708	158	160	101	750	310	220	492	281	130	911	366	73.1
4	1	1	56	195.4	58.5	15.3217	1	2	1	3	130	107	110	259	33.8	439	425	237	466	201	81.9	77.8	106	784	127	109	217	173	105	488	158	35.4
5	1	2	58	160	79	30.8594	2	2	1	3	125	54.5	105	209	38.3	521	334	222	479	275	68.6	73.2	56.9	753	143	115	245	231	64.3	665	179	46.8
6	1	1	60	174.81	64.5	21.107	1	2	2	2	221	89.4	186	344	62.8	707	612	361	741	358	148	161	185	1390	115	176	565	297	107	745	246	73
7	1	1	56	176	83	26.7949	2	2	2	2	241	112	223	491	75.8	748	807	360	901	476	113	114	170	1000	260	198	543	349	121	1360	280	69.5
8	1	1	50	170	72	24.9135	2	2	1	1	259	196	270	526	94.8	828	936	352	914	404	155	117	132	1280	252	205	778	259	123	1630	255	79
9	1	1	56	180	81	25	2	2	1	1	191	89.2	196	342	64.4	453	681	298	586	306	97.7	96.8	116	1230	215	161	452	303	100	969	151	95.7
10	1	1	72	158	50	20.0288	1	2	2	1	278	112	241	427	105	765	775	524	1030	401	186	179	98.7	1300	232	189	466	342	144	1110	285	123
11	1	1	58	170	70	24.2215	1	1	2	3	115	51.1	61	154	22.2	207	236	109	302	154	49.9	50.3	50.5	360	98.4	57.1	159	94.4	67.5	392	98.2	15.7
12	1	1	61	164	57	21.1927	2	2	1	1	110	41.9	86	189	23.2	221	311	142	392	185	52.4	53.8	13.1	431	91.6	56.4	247	103	41.9	381	62.3	28.1
13	1	1	45	165	53	19.4674	2	2	2	3	192	67.5	137	280	44.9	421	446	192	507	280	116	121	44.1	752	205	104	281	167	81.2	659	127	42.7
14	1	1	65	174	68.5	22.6252	1	2	2	1	88	47.5	77.8	130	36.6	272	241	267	495	213	68.3	72.3	79.5	674	104	61.3	316	180	66.6	546	110	44.1
15	1	2	62	156	64	26.2985	2	2	1	1	102	28.1	61.1	117	24	189	213	143	211	135	49.1	47.9	65.2	386	96.7	47	163	97.5	65.9	510	74.6	22.4
16	1	1	55	168	52	18.424	2	2	2	3	71.9	28.4	45.6	107	19.2	117	151	88.9	264	94.6	42.2	38.5	28	313	57	35.7	149	57.7	42.7	265	66.3	19.3
17	1	1	60	174	65	21.4692	1	1	2	3	99.9	21.5	64.2	129	18.4	175	225	100	247	153	87.5	72.7	21.9	295	154	37.2	203	81.4	38	427	88.3	10.2
18	1	1	52	170	64	22.1453	2	2	1	1	75.4	34.6	51.2	103	17.1	129	206	90.1	186	107	36.3	27.5	45.1	280	67	36.4	109	44.6	39.9	215	46.2	14.6
19	1	2	63	156	53	21.7784	1	2	2	1	83.4	38.8	99.5	158	26.7	244	315	152	304	143	58.6	61.8	63.8	564	101	83.7	223	110	50.3	768	104	34.6
20	1	1	55	182.36	52	15.6367	1	1	2	4	140	59.8	86.8	193	34.6	428	384	234	480	225	93.3	80.9	61.3	597	136	95	283	162	34.4	657	169	48.9
21	1	1	49	175	64	20.898	2	2	1	3	74.8	47.1	84.7	178	25.8	240	322	166	511	207	66.9	64.6	83.2	562	89.3	58.3	243	91.6	50.4	482	105	25.3
22	1	1	53	175	77	25.1429	1	2	2	1	127	38.6	87.7	201	21	245	298	156	290	241	62.5	54.6	92.5	345	186	42.9	140	134	46	333	107	11.8
23	1	2	55	156	64	26.2985	2	2	1	1	54.2	27.8	33.5	88.2	13.7	154	168	102	277	128	46.1	44	69.1	440	72	58.4	127	61.7	26.3	346	60	16.6
24	1	2	52	155	52	21.6441	2	2	1	1	92.7	37.3	103	186	27.1	267	305	211	428	239	86.7	71.9	37.7	509	248	90.6	407	50.8	44.3	668	172	26.8
25	1	1	57	175	59	19.2653	1	1	2	3	243	37.5	58.9	175	12.3	101	277	61.2	425	192	74.4	72.6	38.8	139	222	25.9	135	112	48.4	328	62.7	8.19
26	1	1	60	164	61	22.68	1	1	2	3	48.7	19.4	34.2	86.9	3.64	85.2	150	57.4	163	101	30.1	30.1	55.6	189	65.3	27.9	72.4	67.5	23.7	121	42.5	9.14
27	1	1	51	169.73	54	18.7446	1	1	1	1	92.5	29.8	46.8	125	12.3	124	175	86.8	315	159	51.2	45.9	56.7	250	119	26.1	124	112	44.1	320	66.8	7.62
28	1	1	61	170	79	27.3356	1	1	1	1	62.8	30	48.9	114	19.1	191	206	195	225	122	51.2	44.8	76.2	416	74.1	64.4	172	69.2	48.7	327	72	18.7
29	1	2	55	152.02	58	25.0973	2	2	2	3	75.1	46.4	61.1	124	23.3	173	217	161	477	185	68.4	71.1	60.9	427	70.5	53.9	236	98.4	38	348	50.4	37.8
30	1	1	61	165	45	16.5289	1	1	2	2	79.8	35.4	69.6	147	23.3	210	267	152	291	168	67.7	61.3	112	597	79.9	78.6	153	130	38	296	117	52.5
31	1	1	62	165.07	65	23.8549	2	2	2	4	184	86	124	265	38.1	352	427	176	523	208	106	102	105	561	197	106	336	114	48.9	768	156	39.6
32	1	1	48	170.53	74	25.4466	1	2	1	3	182	97.8	198	308	37.1	244	497	185	472	258	131	118	44.5	475	208	113	336	51.2	74.9	486	152	28.2
33	1	1	60	166	63	22.8625	2	2	3	3	186	87.2	133	282	41.1	299	522	210	687	277	123	104	162	700	271	109	554	133	87.8	767	175	46.1
34	1	1	50	173	96	32.0759	1	1	2	1	161	77.6	174	305	38	364	531	197	505	250	105	97.3	96.4	716	135	97.2	332	111	89.5	690	183	44
35	1	1	48	160	60	23.4375	1	2	2	1	146	93.2	167	332	58.3	391	569	337	856	294	141	21.8	92.5	746	125	93.5	646	149	108	838	193	37.2
36	1	1	63	173.64	60	19.8999	1	2	1	3	149	82.7	105	257	49.1	419	421	372	670	311	115	110	122	872	158	135	328	165	95.3	907	181	41
37	1	1	54	164.27	73	27.0524	1	2	1	4	127	78.7	131	239	57	367	429	281	653	270	122	113	142	1040	105	111	342	216	109	910	118	59.7
38	1	1	59	170.33	63	21.7149	1	1	3	4	164	62.3	102	213	29.4	243	393	219	573	297	95.9	90.8	309	1040	133	83.5	410	237	87.4	1020	103	27.1
39	1	1	63	160	70	27.3438	1	1	1	1	271	164	219	488	86.9	517	838	575	1410	495	187	181	347	1770	195	211	669	393	137	1410	143	101
40	1	1	64	170	58	20.0692	1	2	2	2	289	122	219	436	69.3	316	749	373	1090	466	173	163	337	1230	287	114	621	247	193	1050	173	83.8
41	1	1	55	163.16	70	26.2948	1	2	1	4	238	132	218	524	52.7	634	834	285	808	298	146	143	138	1280	164	142	699	219	118	1140	140	69
42	1	1	54	170.06	72	24.8959	1	1	2	3	238	104	139	355	58.1	285	497	325	1420	467	171	166	200	1020	134	132	552	212	118	1220	92.4	47.1
43	1	1	56	168.55	48	16.896	1	2	2	4	245	124	141	370	50.7	370	634	251	973	450	176	175	258	851	195	132	326	202	123	962	205	38.4
44	1	1	50	162	60	22.8624	2	2	3	3	138	67.2	161	234	26.8	247	371	163	325	291	77	78.4	211	440	196	62.5	190	141	101	300	159	29.1
45	1	2	51	164.12	70	25.9881	2	2	1	4	121	52.8	98.2	165	35.5	294	255	175	372	273	68.9	72.4	201	492	178	66.9	198	113	86.8	329	88.7	23
46	1	1	56	167.57	82	29.2026	2	1	1	4	166	65	107	191	32.7	262	341	174	367	226	71	76	130	450	152	65.6	240	133	106	524	79.6	15.7
47	1	2	61	160	60	23.4375	2	2	1	1	107	68	94.7	164	32	231	281	152	241	246	66.2	63.6	131	573	111	67.5	220	99.3	57.8	422	94.2	24.4
48	1	1	54	171.81	60	20.3261	1	1	2	4	147	48	113	223	24.1	198	335	106	166	112	52.2	48.9	76.1	331	93.3	31.3	189	114	70	341	115	21.4
49	1	1	58	176.71	71	22.7372	1	1	2	4	135	61.4	115	179	25.2	182	292	113	215	179	54.6	53.2	85.5	374	83.7	52.1	413	70.4	41.2	458	77.5	32.1
50	1	2	54	162	46	17.5278	2	2	2	3	93.4	31.6	44.1	89.1	14.6	142	174	86.6	268	111	38.3	37.3	104	310	110	27.1	107	73.6	43.7	250	72.6	9.87
51	1	2	54	157	54	21.9076	2	2	1	1	61.4	51.7	52.9	96.1	18.1	119	209	118	312	205	46.6	36.9	64.5	367	52.8	47.5	112	72.2	28.7	394	50.4	17.6
52	1	1	55	168	62	21.9671	1	1	2	1	98.9	56.5	82.7	174	28.8	197	300	121	179	143	50.4	56.9	64	440	61.6	81.4	190	77.6	59	413	74.4	17.8
53	1	1	39	163	83	31.2394	1	2	1	1	113	51.9	111	171	18	136	333	88.2	244	153	42.9	46.5	76.1	356	134	48.6	173	57.8	35.5	288	95.1	16.6
54	1	1	39	180.36	58	17.8298	2	2	2	4	100	44.8	80.2	125	27.1	142	202	103	277	190	40	43.2	110	319	75	41.8	142	80.2	58.5	276	34.8	8.16
55	1	2	52	157.3	55	22.2282	2	2	1	4	100	37.1	63.2	154	24.8	137	229	96.8	263	159	48.2	47.9	112	283	120	56.4	240	54.6	34.6	465	66.3	13.1
56	1	1	62	172	75	25.3515	1	2	1	2	177	76.8	131	206	37.5	189	387	196	277	193	69.8	71	112	496	93	67.4	282	92.4	63.5	423	94.3	36.7
57	1	1	58	168.23	63	22.2604	1	2	3	3	148	79.3	93	172	28.9	166	309	124	191	159	55.7	52.1	88.7	367	88	28.7	251	95.5	57.7	307	84.2	9.08
58	1	1	55	180	100	30.8642	1	1	1	3	135	49.3	75.2	173	24.9	168	244	109	208	175	51.5	53.5	104	396	141	54.3	155	88	60.8	276	87	22.7
59	1	1	55	177.92	48	15.1632	1	2	2	5	125	56.8	67.9	143	23.9	120	229	91.1	264	179	47.5	44.5	60.7	267	67.2	23.1	110	85.4	57.5	294	55	10.5
60	1	1	79	174.52	61	20.0281	1	1	2	4	74.3	25.1	51.7	92.8	17.6	83.5	164	72	139	97.8	30.5	30.4	35.3	256	41.8	23	125	51.5	36.9	219	60.2	22.8
61	1	1	69	158.41	69	27.4969	2	2	1	4	95.2	41.5	88.4	158	25.9	160	263	134	234	174	44.5	50.9	118	445	67.9	40.1	225	94.9	60.4	290	53	23.9
62	1	1	68	173	67	22.3863	2	2	1	2	95	54.9	84.5	178	25.4	256	338	136	385	160	67.4	40.8	57.3	577	118	106	201	104	65.4	500	137	34.2
63	1	2	60	153.01	57	24.3464	2	2	1	4	65.9	37.2	75.6	139	16.6	182	305	127	399	163	49.3	73	50.2	446	371	67.3	202	79.5	37.5	330	113	38.2
64	1	2	70	157.57	52	20.9438	2	2	1	4	88.2	44.9	60.5	133	26.3	201	243	157	434	191	58.8	48	90.7	747	125	73.9	208	167	64.6	631	89	35.7
65	1	1	70	168	73.3	25.9708	1	2	1	1	104	54.2	147	216	27.4	222	391	186	334	244	70.8	58.3	96.5	563	175	67.8	240	186	85.3	479	200	75.3
66	1	1	54	163	51	19.1953	1	1	1	4	147	63.9	77.3	166	19.6	154	274	90.7	391	179	89.8	60.1	51.5	596	125	92.9	196	207	58.8	334	351	35.7
67	1	1	68	168	45	15.9439	1	2	2	1	82.6	54.3	92.8	177	25.3	206	302	116	357	176	56.7	24.7	50.3	570	110	74.4	209	97.8	60.4	332	110	46.7
68	1	1	71	171.73	67	22.7186	1	1	1	4	130	52.6	98	163	28.5	192	245	147	569	209	80.7	78.9	107	487	253	70.2	242	64.4	71.9	446	228	43.2
69	1	1	71	170	57	19.7232	2	2	2	3	104	48	82.1	200	20.1	212	327	114	339	178	56.5	63	79.5	547	142	73	168	121	53.7	290	139	58.1
70	1	1	55	169	64	22.4082	1	1	1	2	93.9	53.3	110	210	32.1	289	362	218	337	208	56.7	30.6	71.1	650	191	103	563	135	61.6	475	216	40.9
71	1	2	62	160	67	26.1719	2	2	1	1	113	58.9	114	179	37.9	276	354	261	513	217	89.5	35.4	81.9	816	164	111	307	149	94.2	534	191	59.2
72	1	1	42	171.49	85	28.9029	1	2	1	4	130	59.4	132	226	39.8	301	382	159	358	268	72.6	59.8	111	611	168	81.7	292	153	79.5	535	156	23.7
73	1	1	58	165	50.5	18.5491	2	2	2	5	132	76.6	131	243	45.6	324	395	157	514	220	83.8	50.2	60.7	690	130	87.5	309	131	76	672	161	54.3
74	1	1	55	172	79	26.7036	1	2	1	3	97.1	65	134	228	33.6	218	403	232	388	216	70.4	41.8	72.4	580	171	94.3	243	152	79.6	456	157	46.2
75	1	1	69	166.51	68	24.5261	1	1	1	4	93.6	42	106	178	21.1	226	320	138	479	174	58.4	34.8	38.1	488	96.8	67.9	209	152	43.6	528	123	31.7
76	1	2	49	165	72.5	26.6299	2	2	1	1	56.9	26.2	55.2	67.6	14	140	180	79.2	212	110	28.8	52.4	39.5	438	54.4	50.6	109	86.3	34.1	255	74.6	26
77	1	2	53	158	64	25.6369	2	2	1	1	68.7	43.2	75.6	118	24.2	168	214	122	256	141	40.7	22.2	42.8	516	50.4	57	118	83.3	49.3	376	69	23.1
78	1	1	59	169	73	25.5593	1	1	1	1	113	30.6	61.2	141	13	131	231	98.1	286	154	52.4	49.8	26.9	412	105	51.3	191	97.6	47.9	356	75.3	16.6
79	1	2	81	155	58	24.1415	2	2	1	1	74.7	49	91.7	148	25	218	269	138	296	173	55.3	22.9	73.5	522	74.6	66.2	167	66.3	50.6	504	147	35.6
80	1	2	34	159.82	54	21.1413	2	2	1	4	126	57.7	87.6	152	25	154	236	118	401	180	44.4	36.5	48.6	356	82.6	35.8	167	122	58.2	324	85.2	16.6
81	1	1	49	180	71	21.9136	1	2	1	1	94.5	65.3	122	188	27.5	199	328	161	378	172	74.5	36.5	56.9	563	164	65.7	197	73.6	53.4	376	220	34.1
82	1	1	53	165	66	24.2424	2	2	1	3	102	79.7	116	181	37.9	297	304	120	297	134	57.6	21.1	55.9	472	89.9	60	189	111	63.1	598	66.2	29.5
83	1	1	74	164.26	62	22.9788	1	1	1	4	131	73.5	109	168	35.8	293	317	174	308	150	65.8	31.9	149	504	102	47.6	240	140	107	567	169	27.4
84	1	2	70	157	65	26.3702	2	2	1	1	135	56.8	66.5	140	29.7	279	214	161	311	175	87.3	32.3	87	582	115	81.5	211	142	59.5	531	192	20.9
85	1	1	64	156.38	48	19.6281	1	2	3	3	96.5	40.5	63.2	118	20.2	213	217	108	342	191	68	42.8	95	435	86.2	48.4	267	176	40.7	472	106	52.3
86	1	2	36	168	49	17.3611	2	2	1	1	89.6	53.9	77.5	138	27.7	239	256	140	370	167	78.1	21.1	46.6	500	74.6	60.3	173	107	51	463	111	31.8
87	1	1	69	168	68	24.093	1	2	1	3	133	44.2	111	182	29.9	242	315	130	435	212	105	37.4	81.6	561	218	75.6	151	86.7	75.8	432	181	36.1
88	1	2	53	156.28	51	20.8816	2	2	1	4	98.1	53.3	79.2	138	29.8	242	299	160	409	176	78.5	23.1	65.1	607	95.8	73.8	150	78.2	69.6	619	123	34.9
89	1	2	48	160	70	27.3438	2	2	1	1	86	52.4	76.8	131	27.1	237	265	180	301	218	66.7	39.9	25.9	384	136	66.2	154	78.2	58.1	477	109	30.5
90	1	1	62	166.66	59	21.2417	1	1	1	4	112	44.2	78.6	156	24.6	182	257	96.9	353	169	52.5	41.9	72.7	443	113	49.3	146	140	46.8	240	62.9	28.5
91	1	2	68	150.74	56	24.6451	2	2	1	4	88.4	39.3	66.2	117	31.3	175	190	138	296	168	52.4	24.1	104	484	77	45.1	179	84.7	51	465	68.4	23.3
92	1	1	60	173.47	50	16.6158	2	2	1	2	97.6	49.4	97.3	168	32.7	319	299	186	391	210	66.6	28.2	84.9	590	122	62.4	209	95.7	61.9	422	139	30
93	1	2	53	158.98	63	24.9262	2	2	1	1	80.5	43.9	55.6	125	32.4	211	198	194	366	141	59	20.3	47.3	662	54.5	50.2	134	137	64.4	364	96.2	34.4
94	1	1	51	168.29	62.5	22.068	1	1	1	5	102	45.4	97.5	188	30.8	306	344	192	440	200	75.8	35.9	45.8	584	131	54.7	196	130	46	352	178	33.9
95	1	1	54	166.1	52	18.8479	1	1	1	4	136	38.7	94	180	27	238	266	136	405	244	67.6	70.5	41.3	447	178	38.4	133	155	52.7	367	144	20.5
96	1	1	52	172	60	20.2812	2	2	1	1	108	69.6	155	240	47.1	340	427	287	642	240	104	32.2	64.9	528	131	61.1	254	133	70.3	599	201	49.9
97	1	1	53	175	70	22.8571	1	1	1	4	138	37.9	99.5	204	24.2	234	354	151	322	173	64.7	45.7	109	344	258	35.1	261	98.9	77.5	479	114	12.1
98	1	2	63	152	51	22.0741	2	2	1	3	86.8	52.5	71.7	127	21.3	199	252	161	281	132	72.4	22.4	54.2	490	97.5	46.4	173	73.6	50.4	507	194	20.8
99	1	2	60	155	58	24.1415	2	2	1	1	99.6	41.8	83.9	175	22.8	189	322	134	829	200	67.9	31.5	91.2	578	105	49.3	253	82.6	58	538	82.7	35
100	1	1	56	171	79	27.0169	2	2	1	1	77.2	43.6	82.5	150	27.8	294	307	202	342	160	66.2	29.8	28.9	571	107	57.5	264	83	47.2	635	117	31.6
101	1	2	54	158	55	22.0317	2	2	1	1	105	67.8	118	181	35.2	274	365	200	318	167	80.3	22.5	42.8	509	91.9	57.2	157	82.5	76.6	539	154	35.5
102	1	2	59	158	52	20.83	2	2	1	0	104	56	63	132	29.6	352	250	214	429	172	58.1	43.3	46.6	675	120	47.5	196	130	55	460	111	35.8
103	1	2	53	159.26	57	22.473	2	2	1	4	110	61.4	115	183	27.7	282	380	130	280	161	53.6	33.7	24.7	626	121	58.3	240	133	84.9	507	109	38.9
104	1	2	49	161	62	23.9188	2	2	1	0	113	65.6	137	118	44.9	266	376	213	375	190	65.4	33	27	630	98.6	49.2	221	112	85.4	323	80.2	33.4
105	1	1	55	178.03	56	17.6686	1	1	1	4	126	61.6	90.2	193	39.9	269	286	131	531	215	70.1	53.6	41.1	670	109	49	279	163	97.9	669	110	42.2
106	1	2	59	150	61	27.1111	2	2	1	3	138	66.9	82.6	157	25	266	274	132	461	192	68	53.1	39.7	630	136	35.7	202	166	93.2	465	154	34.1
107	1	1	53	170	67.5	23.3564	1	2	3	3	117	47.1	83.4	147	21.4	232	293	125	395	183	70.6	68.6	45.6	582	182	37.8	167	152	67.9	475	159	36.3
108	1	1	51	168.14	67.5	23.876	2	2	2	4	153	63.3	93.1	160	26.3	379	299	122	331	191	66.1	50.3	31.5	564	215	51.8	216	122	76.5	530	158	48.8
109	1	1	55	158.71	62	24.6141	1	1	2	3	148	39.8	82.7	144	27.6	201	278	175	460	255	63.8	71.8	35.2	643	172	38.8	213	183	74.8	408	112	33.8
110	1	1	58	186	69	19.9445	2	2	1	4	120	51.2	81.2	142	24.5	166	264	116	395	219	56.6	59.9	25.4	590	109	21.8	245	145	64.1	325	113	36.3
111	1	1	54	176.3	75	24.13	1	2	2	3	141	79.5	118	195	31.5	313	400	119	248	165	53.7	34.2	28.6	432	174	45.2	211	153	111	585	118	31.4
112	1	1	59	166.34	70	25.2991	1	1	3	3	122	59.6	96.4	190	36.4	303	345	252	453	266	72.2	47.1	73	755	157	39.8	218	152	92.5	483	215	50.9
113	1	1	64	160.82	71	27.4523	1	2	1	3	119	58.3	106	182	47.8	331	342	174	531	210	81	50.5	67.4	776	144	41.9	240	172	96.6	601	168	58.6
114	1	1	59	168.85	53	18.5898	2	1	1	4	115	45.2	78.5	145	24.8	224	253	144	392	218	68.1	50.6	66.7	707	111	34	229	160	64.8	385	355	34.4
115	1	1	61	156.14	43	17.6376	1	2	1	5	118	51.8	106	173	36.8	268	343	157	556	236	62.6	44.8	43.1	569	146	34.8	247	180	104	499	139	47.5
116	1	2	54	162	53	20.1951	2	2	1	1	117	66	83.1	145	34.3	285	300	159	395	198	77.8	46	31.5	607	116	38	218	88.8	84.4	604	180	47.9
117	1	1	53	166.89	65	23.3374	2	2	1	4	98.1	70.8	97.5	174	24.6	309	331	137	592	161	63.9	38	53.6	658	92.7	48.8	216	121	54.7	459	118	41
118	1	1	61	158.74	53	21.0331	1	2	1	4	114	56.5	101	218	29.2	157	372	126	334	136	55.2	39	66.1	540	83.4	74.4	310	80.4	67.2	583	91.4	23.7
119	1	1	62	163	62	23.3355	1	2	2	3	146	48.1	89	191	25.2	133	296	92.6	349	165	55.7	47.8	74.8	460	120	56.9	220	109	51.7	404	72.8	18.6
120	1	1	54	172	60	20.2812	1	1	1	2	102	57	78.9	170	28.1	115	278	141	318	153	57.2	20.6	50	479	95.1	81.4	204	42.9	45.5	410	70.1	19.4
121	1	1	55	158	52	20.83	1	2	2	3	86.2	34.7	49.7	107	25.5	131	231	259	443	206	65.7	38.9	88.1	488	87.6	37	242	94.5	42.3	618	82.8	24.2
122	1	1	60	163	68	25.5937	1	1	1	1	115	60.7	107	231	37.6	180	370	217	461	191	76.5	39.7	49.5	559	125	79	398	82	69.1	783	116	27.6
123	1	2	61	171.28	55	18.7478	2	2	1	4	143	74.9	116	250	33.7	169	399	117	308	153	63.7	20.4	100	429	85.1	74.1	335	67.9	66.9	686	70.8	12.5
124	1	2	59	166	62.5	22.6811	2	2	1	1	141	53.2	95.3	205	28.6	168	316	148	414	177	66.4	48.2	53.7	452	154	72.4	172	77.2	80.5	643	94.1	18.1
125	1	1	62	165	60	22.0386	1	2	2	1	109	59.2	96.3	207	28.7	183	374	143	312	126	53.5	27.1	90.7	461	79.8	59.9	258	77	57	585	67.7	20.6
126	1	1	59	174	78	25.763	1	2	1	3	104	62.4	106	229	35.8	134	336	149	352	106	53.1	20.5	72.1	485	61.3	66.3	270	65.5	63.9	754	54.1	17.5
127	1	2	63	155	41	17.0656	2	2	1	1	34.3	18.7	33.8	72.3	22.9	103	172	108	317	137	56.7	20.3	32.7	441	64	54.5	139	52.6	24.9	342	51.5	16.7
128	1	1	62	170	73	25.2595	1	2	2	1	134	40.9	114	245	35	158	355	146	491	166	58.8	47	50.3	426	122	48.9	251	67.2	64.5	577	56.2	17
129	1	1	53	172.94	72	24.0736	1	1	2	4	140	57.7	95.3	205	30.6	154	323	174	430	210	62.3	63.1	78.5	406	160	48	244	87	88.1	567	110	14.4
130	1	1	52	160	60	23.4375	2	2	1	1	118	60.5	121	260	48.2	363	357	289	496	195	82.9	28.8	79.8	745	110	82	356	58.1	53.7	551	115	30.1
131	1	1	55	180	60	18.5185	1	1	1	1	85.2	35.9	80.2	172	31.5	131	270	163	402	128	47.1	20	49.6	438	75.9	46.9	336	43.1	39.8	361	52.2	25.4
132	1	2	55	155	54	22.4766	2	2	1	3	99.4	30	80.2	173	27	116	306	134	541	163	56	32.7	47.1	472	109	57.7	275	38.4	43.4	628	75.2	19.3
133	1	1	53	164.64	59	21.7661	1	1	3	4	116	44.4	88.2	190	19.9	105	244	104	309	125	46.4	47.5	62.5	358	86.8	29.6	227	83.1	46.5	410	52.6	13.3
134	1	1	52	168	68	24.093	1	2	1	1	94.7	45.5	90	194	33.2	137	315	127	398	159	52.7	30.1	78.4	417	141	58.5	220	63.3	44.5	592	77	16.7
135	1	2	54	162	69	26.2917	2	2	1	4	90.7	47.3	78.2	168	27.7	148	319	153	356	137	50.4	26.4	44.6	490	115	54.1	249	57.7	51.1	641	73.2	23.6
136	1	1	61	168.29	63	22.2446	1	1	2	5	160	39.7	127	274	33.9	123	332	123	338	152	55	39	95	370	95.8	48.4	239	75.4	81.5	360	57.9	12.4
137	1	1	60	165	62	22.7732	1	1	2	3	105	38	95.9	206	22	116	341	104	339	143	58.4	40.6	64.7	342	115	38.6	234	47	46.6	433	322	16.6
138	1	1	54	156.73	61	24.8328	1	1	2	4	87.6	25.9	69.7	114	14.4	150	163	73.5	224	184	40.8	30.9	49.6	368	175	30.8	91.6	104	69.3	232	78.7	13.6
139	1	2	54	150	45	20	2	2	1	1	77.7	37.5	57.7	116	30.3	299	190	109	304	193	77.3	36.3	14.3	400	109	76.3	158	153	71.6	399	100	34.7
140	1	1	60	174	70	23.1206	1	1	1	1	73.4	44.8	78.6	153	20.9	266	254	152	254	202	74	22.8	52.2	514	132	75.9	125	106	104	330	130	35.1
141	1	2	60	155	54	22.4766	2	2	1	1	96.9	65.1	90.2	189	33.8	314	361	256	769	318	49.6	28.8	30.7	892	123	16.8	296	127	133	765	143	26.9
142	1	1	58	171	50	17.0993	2	2	1	1	47.2	47.9	60.7	102	10.9	218	173	84.4	212	110	37.2	4.98	48.5	384	51.7	56.7	87.6	69.2	47.4	184	69.7	23.8
143	1	1	54	180	90	27.7778	2	2	1	1	51.2	37.3	56.7	105	14.2	188	175	90.1	195	121	26.8	7.36	44.4	282	83.1	49.7	107	48.8	59.2	310	47.6	12
144	1	1	55	174	63	20.8086	1	2	1	3	95.8	40.9	91.6	163	28.9	285	259	158	321	248	66.9	27.1	63.4	526	114	72.2	191	67.2	105	385	241	33.2
145	1	2	55	165	58	21.3039	2	2	1	1	75.6	65.2	79.5	134	18.4	224	247	128	314	151	28.9	16.6	53.9	496	111	82.8	150	73.8	94.9	447	124	20.2
146	1	1	65	160	57	22.2656	1	1	2	3	111	51.4	75	171	19.1	208	238	118	267	182	32.1	69.3	47.8	368	116	36.8	114	162	118	367	112	26.2
147	1	1	60	165	60	22.0386	1	2	2	1	67.3	34.5	70.6	134	23.6	371	209	117	281	159	45	20.3	83.8	541	89.1	59.3	125	68.8	78.5	480	131	24.9
148	1	2	50	160	52	20.3125	2	2	2	2	69.7	30	59.3	132	19	258	207	103	269	175	40	57.5	43.2	358	105	56.9	181	148	81.7	358	105	29.7
149	1	1	59	160	58	22.6562	2	2	2	2	112	28.8	86	189	25	257	243	133	355	249	61.4	138	112	404	221	57.7	157	158	107	378	171	21.6
150	1	1	66	168	77	27.2817	1	2	1	1	67.3	42.9	101	196	27.9	215	401	129	547	284	43.9	72	48.3	989	188	16.5	395	132	119	970	68.7	30.2
151	1	1	57	170	70	24.2215	1	1	1	3	46.5	44.5	63.7	119	14.6	210	244	118	241	153	35.2	15.8	52.1	516	60.7	50.5	150	133	79.2	368	92.7	25.8
152	1	2	52	163	65	24.4646	2	2	1	1	67.6	72.2	96	158	26.1	290	296	146	255	194	43.3	20.6	72	598	118	79	157	108	117	477	123	32.6
153	1	1	67	165	60	22.0386	2	2	1	1	57.4	38.5	78.7	124	15.9	211	239	141	321	208	46.8	9.68	79.7	596	99.6	67.9	150	75.6	60.6	314	89	45.9
154	1	2	52	154	55	23.1911	2	2	1	1	74	48.7	86.7	161	25.2	407	275	128	311	242	54.5	23.3	39.7	609	120	88.9	155	108	65.3	387	111	41.3
155	1	1	62	174	65	21.4692	1	2	2	3	90.2	62.9	87	162	24.8	313	265	138	357	305	47	63.2	97.5	576	150	64.1	166	166	112	317	109	35.2
156	1	1	64	165.83	76	27.6368	2	2	3	2	123	14.7	57.1	112	7.58	62.4	156	64.1	193	111	44.2	45.5	26.8	34.3	152	16.4	104	91.4	74.8	156	58.9	10.1
157	1	2	64	155	63	26.2227	2	2	1	1	59.6	32	46.6	94	18.6	185	159	142	209	139	44.4	15.1	95.8	474	132	68.3	113	76.8	96.3	250	105	24.6
158	1	2	61	160.09	53	20.6799	2	2	1	4	89.8	36.6	61.6	119	23.9	186	188	147	286	161	63.5	29.9	78.3	446	168	65.4	132	116	104	471	127	12.7
159	1	1	66	170	90	31.1419	1	1	1	3	76.7	40.2	72	117	27.5	240	192	162	215	84.4	57.4	16.9	86.6	454	120	65.5	152	181	121	316	98	39.8
160	1	1	60	176.57	62	19.8865	1	1	1	3	86.5	28.6	60.4	121	23.1	186	183	151	322	196	60.3	58.8	67.8	448	240	56.6	124	78.7	127	246	138	22.1
161	1	1	62	179	79	24.6559	1	2	2	1	81.2	43.1	79	133	25.8	242	226	188	249	122	73	27.8	84.6	506	159	72.1	180	125	135	357	114	33.6
162	1	2	65	150.35	62	27.4274	2	2	1	4	65	39	66.6	117	21.2	236	193	201	440	196	52.2	28.1	109	502	173	69	187	78.9	104	417	119	27.2
163	1	2	62	161	56	21.6041	2	2	1	1	98.2	52.2	92.6	153	28.8	210	252	244	687	232	83.7	47.2	74.7	782	212	91.6	234	143	146	521	87	26
164	1	2	52	163	55	20.7008	2	2	1	1	51.6	43.7	71	137	24.1	170	214	130	251	136	54.4	19.4	41	767	83.5	40.5	159	77.8	111	434	69.5	17
165	1	1	59	177.36	69	21.935	1	1	1	4	112	63.8	114	175	31.8	286	290	241	407	291	55.4	52.4	88.8	618	339	92	220	144	143	468	200	42.6
166	1	1	45	175	73	23.8367	1	1	2	3	104	62.2	94.9	190	29.1	211	286	225	441	192	58.5	62.7	42	554	194	84.2	265	198	160	391	101	31.9
167	1	1	48	159.79	56	21.9325	1	1	1	1	89.5	71.3	116	196	26.9	238	313	186	317	163	57.8	33.1	75.3	726	231	106	279	141	142	557	124	28.5
168	1	2	43	164	54	20.0773	2	2	1	1	144	94.3	130	226	47.3	466	307	328	567	272	140	48.9	46.7	711	380	151	373	127	254	617	247	38.5
169	1	1	58	173	50	16.7062	1	2	1	4	103	59.6	71.8	153	36.6	261	226	209	481	219	45.3	48.3	113	595	183	95.7	214	152	127	333	173	58.5
170	1	1	65	172.92	52	17.3905	1	1	1	5	180	30.2	70.8	200	29.3	93.8	330	163	795	417	98.8	139	87.5	405	401	47.7	165	208	174	744	98.2	28.8
171	1	1	76	174	68	22.46	1	2	1	3	123	48.4	69.8	144	23.2	243	214	150	357	192	75.6	118	133	607	253	66.2	117	185	117	319	131	21.4
172	1	1	72	163	71	26.7229	2	2	1	1	153	95.4	95.1	186	29.1	338	306	187	423	272	92.3	73.7	290	438	331	116	256	170	149	538	343	15.1
173	1	1	67	175.16	60	19.5561	2	2	2	3	114	59.1	48.4	113	26.1	190	189	132	300	241	56.4	63.8	106	307	188	58.4	150	178	98	336	92.5	42.8
174	1	1	55	170	65	22.4913	1	2	2	1	86.4	42.6	80.6	171	36.1	237	255	158	366	200	56.9	32.5	48.7	483	137	57.2	250	177	89.5	572	75.2	32
175	1	2	56	161	54	20.8325	2	2	1	0	87.4	37.8	83.1	174	31.9	206	280	107	463	161	52	31.4	30.3	436	99.5	73.7	197	111	92.9	524	63.2	27
176	1	1	45	168	78	27.6361	1	2	1	3	99.3	33.6	101	192	34.6	254	307	138	275	159	46.6	25.2	33.8	321	159	64	257	105	102	559	133	30.2
177	1	1	62	171.37	41	13.9609	1	2	2	5	139	40.1	150	260	42.1	238	368	196	518	221	86.5	49	90.9	650	194	117	264	74.2	136	518	279	31.8
178	1	1	66	170	65	22.4913	1	1	1	3	63.8	23.8	82	170	28.6	170	294	128	245	120	47.9	35.4	43.7	587	117	49	186	99.4	94.6	535	98.4	36.5
179	1	2	47	165	61	22.4059	2	2	1	5	94.5	33.8	78.8	161	38.6	204	260	148	384	169	65.2	39.2	45.9	479	139	94.2	228	142	87.2	523	54.1	22.3
180	1	2	70	162	48	18.2899	2	2	1	4	81.7	33.8	103	170	47	229	267	192	637	222	59.5	35.1	68.2	518	108	65.9	318	130	116	500	116	44.4
181	1	2	45	160	52	20.3125	2	2	1	5	74.2	29.1	75.1	160	35.1	188	235	134	390	172	55.5	30.1	35.7	434	128	87.3	148	112	86.6	307	79.3	30.4
182	1	2	74	156.03	53	21.7701	2	2	2	1	88.4	19.3	72.2	138	23.4	129	199	111	226	122	34.3	57.6	61.1	257	143	35.8	164	104	95.2	350	69.9	17.6
183	1	1	47	162	77	29.34	2	2	1	4	93.9	44.7	86.5	179	41.6	246	265	206	319	225	64	39.4	89.6	491	207	75.8	266	84.2	112	542	128	27.3
184	1	1	75	155.29	63.5	26.3322	1	2	1	4	62.1	16.4	71.3	143	27.6	193	234	122	235	147	47.7	39.4	84.1	716	112	54.7	192	102	73.5	392	81.2	43.7
185	1	2	65	159	59	23.3377	2	2	1	3	93	24.6	63.4	147	24.8	171	215	161	283	151	45.7	57.2	75.6	315	116	44.2	135	116	90.2	346	123	23.2
186	1	1	54	176	86	27.7634	2	2	1	3	105	23.7	127	229	44.7	336	383	250	441	411	92.1	48.7	87	867	204	56.9	373	172	99.7	591	80.2	29.7
187	1	2	50	161	67	25.8478	2	2	1	4	90	29.3	105	179	30.6	222	305	169	317	166	73.6	40.1	67.9	496	120	62.7	248	111	103	564	89.3	24.2
188	1	2	55	159.72	60	23.5197	2	2	2	4	82.9	27.8	88.2	144	29.1	209	267	179	372	189	62.2	45.3	54.8	546	169	60.2	258	153	92.5	569	155	39.2
189	1	1	42	173.31	66	21.9734	2	1	1	4	144	56.7	180	282	62.6	623	433	570	625	469	112	75.5	92.2	744	293	69.1	447	259	223	842	324	53.2
190	1	1	59	170	62	21.4533	1	1	3	4	127	47.8	139	299	36.8	159	461	217	348	241	74.2	63.8	53.1	568	322	34.8	208	112	148	489	134	27.5
191	1	1	64	160	60	23.4375	1	2	1	3	87.8	33.4	90.5	174	40.2	314	278	228	391	226	80.9	50.1	98.9	565	197	81.7	276	190	104	548	204	39.6
192	1	1	77	178	81	25.565	2	2	1	4	90.1	62.7	74.8	164	34	242	272	154	298	159	50.2	35.4	128	756	179	76.4	260	128	86.3	553	107	37.8
193	1	2	48	162	61.5	23.4339	2	2	1	4	77.2	39.8	43.1	145	33.1	185	252	214	509	201	50.5	25.7	43.9	761	138	67	261	95.8	115	411	136	30.6
194	1	2	71	140	45	22.9592	2	2	1	1	96.9	40.8	38.7	172	19.4	101	225	141	295	128	37.1	40.4	48.6	434	135	34.3	211	109	135	461	117	25.7
195	1	2	73	170.7	49	16.8162	2	2	1	2	107	65.2	75.8	164	34.5	322	276	159	385	228	67.2	75.4	156	778	207	83.2	233	201	139	470	217	47.9
196	1	1	71	174	72	23.7812	1	1	1	5	102	58.9	62.5	155	31.7	264	277	197	385	259	59.9	48.6	143	948	284	91.7	201	161	127	437	257	39.9
197	1	2	70	158.67	41.5	16.4838	2	2	1	1	120	55	52.2	180	51.5	335	263	238	453	314	83.5	116	102	819	337	85.9	234	269	176	580	206	47.7
198	1	1	61	167.94	48	17.019	1	1	2	3	104	54.3	59.5	167	26.8	188	247	105	327	197	29.1	58.9	61.3	620	219	57.8	272	181	120	443	227	45.9
199	1	2	62	159	53	20.9644	2	2	1	4	121	67.3	70.1	166	57.1	288	267	195	386	264	71.5	36.8	141	688	323	71.2	219	87.6	167	489	308	30.9
200	1	1	65	162	65	24.7676	1	1	2	0	123	63.8	68.1	155	26.9	260	295	190	403	270	69.7	79.4	176	810	437	82.1	241	40.5	102	456	326	63.7
201	2	1	53	174	80	26.4236	1	2			105	46.1	79.7	167	17.6	137	257	111	246	115	45.4	32.5	65.7	407	114	56.5	215	87	54.8	352	55.3	20.3
202	2	1	55	173	72	24.0569	1	1			51.1	24.7	37	80	17.4	162	135	117	180	108	33.1	34.8	49.4	245	59	35.6	78.8	63	33.8	250	46.6	4.98
203	2	1	54	173	79	26.3958	2	2			72.5	37.7	55.1	111	17.6	139	191	86.5	212	141	44.6	32.2	12.8	260	60.2	38.8	131	47.5	41.7	274	56.6	8.23
204	2	1	54	170	82	28.3737	1	2			56.7	33.9	62.4	116	15	138	198	92.7	139	103	32	24.2	44.9	267	51.9	39.4	137	41.9	40.9	390	38.8	8.99
205	2	1	54	165	72	26.4463	1	1			55.1	30.9	58.6	113	17.6	169	201	90.7	136	84.9	30.7	24.2	64.5	288	47.2	43.2	138	73	33.4	321	57.6	10.2
206	2	1	54	168	77	27.2817	2	2			93.8	53.3	73.2	156	24.7	230	282	174	304	165	65.7	65.3	57.8	576	85.7	76.8	363	79.1	50.5	472	89.1	25.4
207	2	1	55	170	71	24.5675	1	2			57.9	26.8	51.5	89.3	16.2	122	133	88.5	154	85.2	36.5	36.9	40.5	191	55	35.1	123	34.7	26.8	282	45	7.53
208	2	1	54	165	60	22.0386	2	2			96.1	46.4	76.1	161	26.2	191	260	157	284	167	51.8	40.4	38.9	443	72.5	58.8	253	90.6	46.7	489	70.4	19.9
209	2	2	52	165	64	23.5078	2	2			117	56.6	96.9	211	28.1	303	361	138	353	149	68.2	55.5	49.4	595	93.4	98.5	214	85	67.3	569	94.3	18.6
210	2	1	57	175	80	26.1224	1	2			141	74	123	257	43.6	313	383	195	421	221	91.5	93.4	114	775	142	82.6	216	144	90.9	747	78.6	21.5
211	2	1	61	181.98	77.2	23.3115	2	2			219	90.6	202	387	60.7	475	674	342	937	715	154	138	106	1010	192	146	490	156	148	789	267	51.3
212	2	1	54	170	63	21.7993	2	2			198	113	199	408	57.4	487	735	238	899	384	107	107	243	849	216	129	445	133	131	994	141	38.5
213	2	1	55	170	67	23.1834	2	2			177	125	155	331	56.7	392	572	294	1060	510	154	154	102	1150	172	153	388	189	136	795	264	44.7
214	2	1	57	171	82	28.0428	2	2			96.7	53	76.4	157	28.8	223	288	172	301	203	53.1	52.8	84	541	117	48.2	224	86.8	71.6	525	78.6	20.7
215	2	2	63	153	51	21.7865	2	2			103	51.5	75.9	157	26.8	231	298	143	364	179	58.1	53.1	127	538	96.2	56.7	239	99.1	77	477	76.6	29.5
216	2	1	54	170.5	73.8	25.3868	1	1			103	60.6	99	206	30.4	226	345	191	355	219	84.8	85.5	66	621	113	79.5	226	111	65	394	102	41.8
217	2	1	54	178	55	17.3589	1	2			94.1	45.7	91.3	213	30.1	267	309	145	366	203	58.6	57.1	167	501	106	50.8	156	103	57.8	341	90.7	26.9
218	2	2	54	156	66	27.1203	2	2			83.1	44.3	69.4	141	23.7	179	247	169	330	198	64	66.4	63.7	498	88.1	60.7	217	69.7	54.6	380	131	17.5
219	2	1	49	165	70	25.7117	1	1			192	118	148	347	59.1	427	626	350	1270	334	162	157	147	1060	160	133	677	235	105	1220	134	65.9
220	2	2	49	159	66	26.1066	2	2			101	43.8	68.8	177	22.5	207	372	155	317	193	66	63	71.4	666	115	68.1	153	87.5	57.3	618	64.3	26
221	2	2	45	161	70	27.0051	2	2			118	83.2	91.5	195	37.3	255	359	214	841	322	88.8	85.7	141	886	100	101	292	121	87.3	798	85.4	28.4
222	2	2	52	162	62	23.6244	2	2			73.1	36.5	57.9	130	18.7	179	229	175	293	162	55.2	51.3	46.1	405	137	43.9	150	65.2	42.4	433	51.5	16.2
223	2	1	51	172	61	20.6193	2	2			60	28.6	36.4	93.3	14	113	167	116	262	120	44.5	40.7	65.7	399	55.3	37.2	89.5	53.5	30.3	200	32.6	16.9
224	2	1	66	165.34	77.1	28.2032	2	2			73.8	35.2	71.4	146	22.2	187	278	166	266	176	53.3	50.5	116	377	72.2	38.1	143	74.4	36.6	499	74.2	19.5
225	2	1	62	166.49	75	27.0573	2	2			55.1	29.2	46.8	104	17	99.7	180	125	204	106	41.3	39	77	217	108	26.7	153	36.6	35.1	296	45.5	10.8
226	2	1	54	175	80	26.1224	1	1			80.4	43.2	130	223	25.2	192	388	225	433	227	68.2	64.8	132	628	118	48.9	314	101	37.1	606	82.3	19.8
227	2	1	54	165	70	25.7117	1	2			109	59.4	96.9	208	34.4	186	381	165	375	202	66.4	62.4	136	573	119	60.5	248	59.5	63.1	841	95	17.5
228	2	1	54	170	60	20.7612	2	2			92.7	63.4	95.3	217	33.4	251	421	233	593	193	81.4	75.5	125	683	90.4	69.3	247	112	45.6	649	79.3	30.7
229	2	2	53	162	60	22.8624	2	2			47.2	25.5	40	72.7	16.2	111	136	128	193	136	41.7	39.7	31.8	361	33.4	26.4	78.1	40.1	27.9	286	33.3	6.83
230	2	1	57	165	70	25.7117	2	2			152	95	131	199	39	228	366	186	369	175	82.7	41	89.6	367	247	63.6	219	144	76.1	615	155	34.4
231	2	1	57	170	80	27.6817	2	2			115	73.7	85.2	144	37.3	206	275	166	326	166	54.4	27.2	58.5	379	107	53.7	169	105	68.4	491	99.5	25.1
232	2	2	55	156	53	21.7784	2	2			93.9	63.8	97.7	158	28.3	183	288	141	407	129	48	21.9	29.6	410	71.8	40.1	289	86.3	58	486	70.8	29.8
233	2	2	68	159.48	40.5	15.9236	2	2			108	59.6	111	166	28.3	272	302	120	260	144	51.3	36.6	44.6	423	127	48.3	198	134	72.4	615	152	31.1
234	2	2	57	163	55	20.7008	2	2			110	74.3	86.1	158	39.2	202	267	157	407	140	60.9	27	38.1	365	124	46.8	213	87	52.1	600	132	28.6
235	2	2	65	156	59	24.2439	2	2			99.5	58.4	71	114	31.2	169	215	112	494	139	45.8	24.6	26.1	437	100	41.1	145	107	41.8	409	81.5	32
236	2	2	55	152.27	41.8	18.028	2	2			124	64.2	82.9	147	34.3	158	247	127	298	159	52	28.3	30.8	389	112	52.7	214	107	69.3	509	75.2	19.8
237	2	2	62	155	55	22.8928	2	2			104	54.7	69.3	133	32	178	239	134	314	148	65	31.6	51.9	446	100	50.4	300	78.6	48	352	126	30.6
238	2	2	54	160	58	22.6562	2	2			77.7	52.9	65	121	34.7	172	239	148	343	125	44.2	19.8	23.5	392	78.6	39.1	140	68.7	55.3	445	56.2	19.3
239	2	2	58	155	52	21.6441	2	2			98.6	53.1	66.4	138	24.2	158	259	101	319	142	52.2	44.8	30.4	330	109	32.3	191	91.8	48.3	512	97.9	17.3
240	2	2	65	158	60	24.0346	2	2			85.5	60.2	83.1	140	27.1	183	265	131	302	123	53.4	23.5	42.9	416	77.6	43.9	186	117	56.9	405	145	31.6
241	2	2	54	160	68	26.5625	2	2			104	58.6	89.1	162	26.9	146	272	127	230	121	38	20.6	26	371	85.5	49.2	160	105	60.3	497	55.5	12.2
242	2	2	58	160	60	23.4375	2	2			99.8	78.2	64.9	119	27.7	166	233	97	314	108	56.4	19.2	46.8	468	72.9	44.6	119	66.7	58.8	423	69.2	23.1
243	2	2	63	145.22	45.6	21.6228	2	2			102	64.9	76.9	143	27.7	194	268	121	274	104	59.5	22.7	62.8	408	112	43.6	176	95.4	72.4	589	87.4	26.9
244	2	2	65	162	55	20.9572	2	2			118	63.1	70.4	142	19.8	185	251	118	259	166	37.5	34.7	38	335	65.2	66.1	217	113	39.1	406	55.6	22.1
245	2	2	58	150	60	26.6667	2	2			113	65.7	72.8	167	23.3	177	274	108	202	159	37.3	36.2	36.4	366	89.8	59.7	197	70.3	54.8	403	58.4	22.3
246	2	2	68	155	60	24.974	2	2			105	72.1	77.9	160	24.9	133	257	95.6	198	108	45.4	44.5	26.8	363	54.7	67.9	159	70	54.7	445	38.1	14.8
247	2	2	59	155.38	48.2	19.9644	2	2			125	59.5	67.7	145	24.9	162	278	123	220	176	50.8	55.3	31.2	374	75.8	58.6	175	101	71	393	52.7	18.1
248	2	2	53	158	57	22.8329	2	2			94.8	59	85	99.5	22	127	241	104	247	148	37.9	37.1	19.1	335	76.7	42.8	206	75.8	32.1	339	53.8	18.2
249	2	2	58	162.5	45	17.0414	2	2			61.7	29.4	40.2	93.5	13.2	100	166	82.4	167	95.8	27.7	25.9	7.06	296	46.8	28	96.7	52.8	22	261	42.1	12.6
250	2	2	65	156	60	24.6548	2	2			87.9	49.9	59.5	139	20.9	113	213	129	284	173	49.5	45	13.2	368	62.3	32	181	87.1	49.6	323	100	22
251	2	2	51	158	61	24.4352	2	1			90.2	52.9	68.3	133	27.9	152	220	126	207	144	42.3	48.9	48.8	315	53.9	57.5	218	76.9	60.4	483	46.6	15.9
252	2	2	56	158	67	26.8386	2	2			101	59.1	61.8	131	23.7	108	204	122	437	309	80	42.2	43.3	378	55.4	38.5	377	85.6	57.1	312	52.6	16.4
253	2	2	59	158	52	20.83	2	2			85.2	40.4	52.1	110	12	78.3	218	71.2	383	258	54.7	29.2	9.45	266	59.5	33.8	230	59.4	26.2	230	21.8	8.45
254	2	2	53	162	68	25.9107	2	2			92.7	52.2	59.7	115	21.8	95.3	198	71	432	215	74.3	35	61.4	255	54	46.7	341	53.8	44.3	347	34.8	12.5
255	2	2	55	165	53	19.4674	2	2			104	78.9	77.9	135	18.6	115	239	86.8	595	225	59.9	36	23.7	252	50.1	28.3	245	48	33.1	339	29.5	13.1
256	2	2	61	161	67	25.8478	2	2			98.3	55.4	74	121	21	128	238	112	323	209	65.2	36.6	52	331	76	40.2	287	53.3	40.1	353	43.4	11.9
257	2	2	65	168	71	25.1559	2	2			101	59.5	59.6	116	21.3	97.1	223	67.6	597	285	65	36.5	59.2	343	67.2	22.2	229	55.4	44.7	322	47.8	14.9
258	2	2	53	155	57	23.7253	2	2			96.7	41.9	53.3	112	21.2	103	189	83.6	547	271	78.7	40.7	30.6	214	58.5	54.3	273	56.2	27.8	314	31.9	13.9
259	2	2	63	158	50	20.0288	2	2			81.9	40.4	51	106	14.4	107	205	99.7	341	235	64.4	33.8	30.3	349	53.6	21.7	263	47.3	48.7	235	37.4	14.3
260	2	2	54	150	54	24	2	2			90.7	56.6	57.1	128	23.8	145	210	116	527	351	84.2	49.8	46.4	389	79.9	21	261	83.9	63	352	32.7	12.9
261	2	2	53	157	50	20.2848	1	2			103	42.8	82	146	21.4	137	261	149	403	293	84.1	49.5	51.5	492	91.3	17.8	301	69.8	64.5	378	58.8	16.6
262	2	2	54	157	53	21.5019	2	2			77.5	45.5	57.5	134	21.9	158	215	123	293	165	51.6	25.3	18.3	452	80.5	63.8	97.8	86.2	58.3	240	71	23.3
263	2	2	59	145.36	55.7	26.3612	2	2			76.9	34	70	134	22.8	195	229	110	313	130	35.1	23.9	40.6	427	70.9	62.6	126	114	55.5	386	76.4	22.2
264	2	1	58	165	65	23.8751	1	2			87.6	70.5	104	190	29.8	237	364	153	217	167	47	22.3	35.1	474	88.7	71.2	187	82.6	53.2	421	78.2	28.4
265	2	1	68	164	80	29.7442	2	1			94	64	57.1	133	23.8	163	217	97	182	102	34.5	11.5	50.9	341	78.9	69.2	153	93.6	64.1	516	85.1	19
266	2	2	64	152	50	21.6413	2	2			79.3	37	65.2	126	20.7	141	235	133	229	175	44	25.6	30.4	424	73.5	63.5	103	98.7	46.9	265	62	20.6
267	2	2	56	162	60	22.8624	2	2			143	72.8	88.8	196	31.2	285	262	154	369	247	75	40	46	483	135	97.9	166	197	81	507	137	36
268	2	2	59	156	54	22.1893	2	2			77.8	57.9	59.1	139	18.2	137	240	83.5	354	136	44.1	15.7	32.9	522	46.5	62.6	146	84.6	46.5	355	85.2	28.4
269	2	2	61	155	55	22.8928	2	2			70.9	40.7	70.6	117	19.3	141	253	97.3	228	120	38.6	9.85	36.9	379	62.6	56.2	132	82.2	54.6	376	76.2	22.4
270	2	1	53	179	85	26.5285	1	1			95.6	64.7	104	198	25.9	172	329	132	325	163	51.9	19.4	37.1	438	95.3	63.7	196	108	51.6	388	74.2	23.3
271	2	1	54	165	75	27.5482	1	1			90.7	57.5	163	218	28.2	243	343	187	284	182	65	20.4	33.8	535	104	74.8	207	113	66.2	377	123	27.2
272	2	1	56	180.3	64.1	19.7182	2	2			86.5	53.4	75	142	25.6	223	227	140	322	187	48.8	25.6	39.2	504	82	78.2	154	138	51.8	303	81.3	23.5
273	2	1	53	170	80	27.6817	1	1			82.2	63	131	208	23.6	208	396	145	255	171	64.2	28.2	59.7	569	154	79.5	209	80.9	69.8	475	168	25.5
274	2	1	54	174	57	18.8268	1	1			85.8	53.3	77.2	155	32.2	171	282	151	290	171	58.6	14.8	44.8	480	84.7	83.9	179	107	78.6	358	72.1	24.2
275	2	1	54	166	64	23.2254	2	2			82	63.3	90.2	193	30	185	306	123	259	149	54.2	16.1	34.3	509	83.9	74.3	215	65.5	72.9	532	94.9	22.1
276	2	1	53	162	53	20.1951	1	1			104	49.1	101	212	24.4	119	315	124	262	120	51.8	26.7	27.7	376	89.9	64.5	290	105	43.3	303	76.1	34.5
277	2	1	57	171	69	23.597	1	1			78.9	65	95.3	158	21.7	164	286	116	240	129	68.7	14.3	46.9	605	71.5	67.4	177	93.8	43.8	286	110	32.5
278	2	1	53	175	75	24.4898	1	2			68.6	41.3	65.3	143	19.7	135	255	120	243	131	54	9.06	71.3	469	77.2	12	205	80.3	41.8	416	90	24.4
279	2	1	53	158	58	23.2335	2	1			106	54.4	143	235	25.9	216	342	143	221	165	49.6	2.07	26.1	287	157	97.2	269	99.8	61.1	509	111	17.8
280	2	1	55	169	63	22.0581	1	1			88.3	68.8	66.2	126	26.1	143	227	162	253	103	47.8	24.3	8.48	357	65	52.5	205	86	38.6	461	85.2	22.8
281	2	1	53	165	62	22.7732	1	1			114	75.7	135	215	37	288	386	136	231	130	55.8	20.5	49.2	456	112	75.4	257	88.6	68.6	724	95	18.7
282	2	1	54	165	74	27.1809	1	1			123	77.5	122	215	42	343	346	169	265	154	59.2	25.8	54.2	410	131	72.1	197	120	65.8	524	140	26.9
283	2	1	57	160	68	26.5625	1	1			114	74.2	91.4	166	36.7	268	306	176	252	147	52.4	22.9	53.6	406	138	73	229	108	66.8	637	130	18.5
284	2	1	53	166	68	24.677	2	2			126	89.9	118	211	35	375	396	169	371	164	79.1	28.7	53.9	591	135	66.2	252	175	62	663	92.9	26.8
285	2	1	53	168	65	23.03	1	1			105	76.6	96.3	167	31	234	312	186	415	193	80.9	30.2	62.5	560	148	40.8	216	141	60	494	126	35.1
286	2	1	53	175	68	22.2041	2	2			187	98.7	125	260	44.9	392	393	247	560	290	102	49	103	727	249	75	337	197	141	696	160	43
287	2	1	57	170	79	27.3356	1	1			118	91.4	104	204	39.2	309	368	222	344	210	69.9	21.6	108	559	94.9	42.3	249	132	75.7	543	123	19.3
288	2	1	54	178	90	28.4055	2	1			158	100	151	269	55	369	514	326	589	302	117	41.3	113	1040	174	55.1	289	181	103	601	112	57.5
289	2	1	53	165	60	22.0386	2	2			88.7	58.9	75.2	130	38	212	255	202	520	157	95.6	32	34.4	599	66.9	41.4	180	105	52	587	101	32
290	2	1	54	170	62.5	21.6263	1	1			152	101	137	217	40	312	359	205	415	218	116	32.8	134	694	172	71.8	334	142	69.7	653	172	36.7
291	2	1	52	170	71	24.5675	2	2			134	83.5	105	218	34	229	359	196	346	193	67.6	32.5	50.6	479	162	49.7	276	105	77	596	86.1	25.8
292	2	1	54	163	65	24.4646	1	1			149	78.9	103	199	34.4	221	334	227	435	224	86.7	43.2	38.5	568	147	56.1	199	123	81.8	573	76.4	23.7
293	2	1	54	169	87	30.4611	2	1			122	65.5	77.1	145	36.7	214	256	257	329	201	73.7	18.1	61.2	485	110	44.6	187	98.6	76.6	482	72.9	18.8
294	2	1	59	179	65	20.2865	1	1			97.1	81.8	92.3	172	32.9	249	313	173	369	195	83.4	22.9	75.7	611	113	36.7	188	88	82.9	411	80.2	32.6
295	2	1	52	173	72	24.0569	2	1			88.1	61	96.6	175	30.8	328	316	195	373	234	70.3	31.2	76.1	571	150	27.5	178	87.1	49.6	552	84.5	21.5
296	2	1	54	176	90	29.0548	1	2			125	63.6	77.7	170	32.3	201	340	202	403	199	79.8	45.7	66.7	576	168	51.9	152	114	84	545	134	46.2
297	2	1	52	165	68	24.977	2	2			190	135	165	315	62.8	384	505	252	395	290	122	33.5	127	761	211	57.8	261	123	226	729	173	49.3
298	2	1	58	171	67	22.913	1	2			157	102	138	251	46	247	454	225	391	204	118	32.7	56.5	782	123	38.7	293	77.3	208	633	129	45.6
299	2	1	54	176	75	24.2123	1	1			220	108	147	264	56	274	481	254	544	249	113	40.9	93.6	643	148	25.7	395	181	102	791	87.3	30.1
300	2	1	56	175	75	24.4898	2	1			77.1	54	72.7	137	27.5	170	266	203	320	164	68.2	12.8	128	553	56.1	14.2	216	72.7	44.7	359	46.8	24.8
301	2	1	54	173	67.8	22.6536	1	1			86.8	70.3	59.8	142	27.8	122	271	174	362	150	64.5	22.4	66.5	434	63.1	43.2	189	59.3	50.5	454	31.1	13.7
302	2	1	55	180	80	24.6914	2	1			145	65.9	91.6	184	34.2	282	386	116	372	170	69.7	31.9	44.4	540	121	97.2	292	116	87.5	519	150	26.5
303	2	1	55	173	78	26.0617	2	1			123	62.8	98.5	188	32.9	405	341	127	291	160	58.3	35.3	36.1	519	122	76.6	238	121	72.4	557	120	42.8
304	2	1	54	180	80	24.6914	1	1			161	106	108	188	42.1	214	349	133	514	182	59.7	29.6	47.2	668	140	76	257	156	134	637	85.4	38.1
305	2	1	54	170	70	24.2215	1	2			126	82.3	105	181	38.5	304	325	141	379	168	65.9	32.6	38.6	722	88.1	86.1	230	195	89.9	517	180	42.4
306	2	1	54	171	80	27.3588	1	2			100	73.4	83.6	150	40.1	244	283	133	419	162	56.3	30.6	52	621	78.7	89.7	208	164	89	453	96.2	34.9
307	2	1	54	165	54	19.8347	1	1			100	68.4	69.3	132	35.1	191	280	158	413	190	60.1	28.6	63.1	505	75	51.8	246	126	74.1	497	87.6	39.8
308	2	1	54	164	60	22.3081	1	2			128	78.2	107	186	30.1	272	343	131	324	154	52.9	35.5	47.5	703	93.9	76.6	234	174	73.9	538	60.7	28
309	2	1	54	170	65	22.4913	1	1			104	60.7	76.7	147	26.5	186	269	133	292	162	59.1	39.6	54.2	653	109	58.2	233	123	61.2	410	210	37.7
310	2	1	54	179	85	26.5285	1	1			121	70.2	87.4	171	34.3	366	301	126	373	174	57.3	45.9	48.3	630	94.2	58.7	233	129	82.8	518	85.9	25.8
311	2	1	54	168	72	25.5102	2	2			95.6	67	92.7	170	35.2	228	360	163	380	176	57.8	31.6	59.2	645	65.5	42.6	211	113	89.1	394	123	42.4
312	2	1	54	169	68	23.8087	1	2			140	86.7	115	212	45.9	352	372	171	429	217	71.5	50.7	39.1	803	129	74.3	187	158	110	546	150	49.7
313	2	1	68	168	75	26.5731	1	1			95.2	53.1	61.8	52.9	26.6	234	200	142	464	213	54.1	29.5	95.9	669	89.7	54.8	144	144	95.1	389	114	36.6
314	2	1	54	177	72	22.9819	1	1			111	63.7	81.8	176	29.4	266	308	148	316	128	66.3	40.1	52.6	527	116	43	174	139	76.7	417	93.7	26.6
315	2	1	54	177	90	28.7274	2	2			85.3	58.6	72.6	151	26.2	244	300	124	352	176	46.1	31.5	57.5	641	66	49.4	159	112	80.4	490	81.4	25.8
316	2	1	54	172	67	22.6474	1	2			103	54.2	49.6	104	32	207	188	220	474	232	65.1	41.4	18.7	709	99.1	55.7	168	172	67	501	128	59.4
317	2	1	54	168	72	25.5102	1	2			112	53.6	66.2	142	34.5	255	273	138	303	182	48.6	37.8	40	554	105	28.5	245	139	78.6	521	76.4	27.1
318	2	1	64	170	75	25.9516	1	2			119	53.8	88.5	161	34.3	214	310	159	433	235	62	37.4	33.5	660	146	61.2	237	133	97.7	417	146	46.2
319	2	1	54	175.32	57.3	18.642	1	1			152	87.5	130	236	46.4	472	412	151	399	187	66.3	41.7	41.4	671	186	89.9	494	196	99.8	719	148	49.2
320	2	1	56	173	80	26.7299	1	1			100	54.8	87.8	189	33.4	229	293	209	335	199	63.2	34.4	50.3	549	106	75.9	193	127	49.9	492	103	35.1
321	2	1	54	165	65	23.8751	1	2			118	78.3	108	221	39.5	264	398	139	371	160	62.3	32.8	47.5	682	109	89.1	253	114	69.1	785	110	24
322	2	1	54	165	64	23.5078	2	1			142	89	92.4	199	39.6	256	354	174	331	192	64	32.8	35.9	601	147	112	240	136	79.3	540	97.5	35.7
323	2	1	54	168	66	23.3844	1	1			148	71.2	102	218	37.9	184	337	135	311	150	58.2	35.5	67.9	491	101	72.7	237	151	69.9	515	65.7	26.1
324	2	1	54	172	65	21.9713	2	1			110	50.7	108	232	29.9	263	367	140	386	163	65.5	26.8	96.8	637	85.4	61.9	203	79.8	59.6	470	166	39.6
325	2	1	54	160	75	29.2969	1	1			151	62.4	106	228	32.7	256	411	173	445	246	69.1	44.4	87.2	651	144	50	221	140	87	725	172	28.8
326	2	1	55	164	62	23.0518	2	1			79.7	50.7	81.7	167	23.3	169	292	118	316	125	53.6	19.5	64.3	479	72.3	56.4	166	49.4	39.4	492	105	22.8
327	2	1	58	165	70	25.7117	2	2			67.3	38.1	62.3	134	17.5	148	200	107	385	157	41	21.9	42.6	437	56.6	52.7	101	72.5	26	335	62.7	20.4
328	2	1	54	170	70	24.2215	1	1			133	72.7	82.5	178	24.1	216	316	141	254	169	41.8	28	48.1	423	70.1	48.9	236	110	44	516	73.5	14.3
329	2	1	54	170.5	90	30.9595	1	1			58.7	34	62.1	133	18.8	154	197	140	346	146	43.2	17.9	27.9	434	51	35.2	157	51.5	25.1	253	66.5	14.9
330	2	2	54	165	54	19.8347	2	2			100	50.4	73.7	158	32.7	167	280	151	297	117	44	21	91.3	332	90.2	27.7	251	79.6	50.6	543	77.1	20.8
331	2	1	61	167	69	24.7409	1	1			124	81.6	86.3	186	34	201	258	165	469	204	61.7	18.8	27.8	484	65.2	59.2	237	87.5	75.2	504	97.5	15.7
332	2	2	55	150	52	23.1111	2	2			88.6	61.1	88.4	194	28.1	481	322	172	336	274	50.4	45.6	123	637	171	81	292	219	127	614	199	54.2
333	2	1	55	170	79	27.3356	1	1			55.6	67.4	88.6	164	27.1	319	303	110	286	202	42.3	5.6	82.6	504	66	78.2	205	71.3	110	492	141	32.7
334	2	2	54	158	51.9	20.7899	2	2			42.8	31.6	40.2	95.2	15.2	114	214	78.3	360	152	23.2	15.1	39.8	516	57	33.8	148	91.9	67.3	396	40.7	14.8
335	2	1	54	171.5	73	24.8196	1	1			81.7	88.1	80.5	159	35.6	326	286	152	333	233	54.2	23.6	78.6	512	98.6	82.6	214	108	146	474	102	34.1
336	2	2	54	160	55	21.4844	2	2			28.7	25	29.9	74.9	11.2	71.2	173	68.5	289	127	21.9	14.7	30.4	518	56.1	28.1	102	52.9	40.4	428	33	12.9
337	2	1	54	170	66	22.8374	1	2			38.3	27.3	49.9	95.6	10.1	183	181	99.8	192	121	19.3	6.02	47.3	358	67.5	38.4	113	59.5	51.1	274	56.6	27.7
338	2	1	56	176	68	21.9525	2	1			56.6	45.9	76.8	143	17.6	232	238	138	270	167	27.6	27.5	48	457	73.6	55.8	165	71.8	97.1	365	87.8	24.8
339	2	1	66	169	89	31.1614	2	2			62.9	79.9	98.3	174	34.2	546	301	203	326	150	45	1.74	142	616	184	127	208	83.4	145	474	237	50.3
340	2	1	64	172	63	21.2953	1	1			42.3	63.3	88.1	139	19.3	223	248	95.1	168	68	28.7	7.85	66.1	317	102	66.4	132	35.2	90.2	319	76.1	29.4
341	2	2	54	160	55	21.4844	2	2			41.1	55.1	81.9	149	25	312	236	143	188	115	40.9	14.7	107	348	115	69.6	159	73.6	96.1	382	78.5	20.7
342	2	1	78	169	88	30.8112	1	1			41.6	38.2	68	132	17.3	260	236	126	323	221	33.7	33	72.9	367	90.5	48.3	245	67.2	101	357	92	18.5
343	2	1	54	167	78	27.968	1	1			27.3	35.3	48.1	92.1	15.6	205	169	152	224	83.1	29.7	7.67	80.1	386	117	85.7	327	49.1	72.2	255	75.1	27.1
344	2	2	54	159	52	20.5688	2	2			44.3	38.6	87.8	170	21.3	203	246	183	232	140	28.6	10.6	87.6	375	140	58	201	59.9	94	403	113	24
345	2	1	54	165	65	23.8751	1	1			90.2	49	73.7	118	29.1	257	181	152	237	132	59.4	23	34.4	376	96.6	88.7	180	107	120	376	138	28.1
346	2	1	56	172	77	26.0276	1	1			105	46.5	80	123	27.6	380	199	195	361	171	73.7	47.5	52	501	180	92.5	189	211	110	386	172	30.8
347	2	1	56	172	85	28.7317	1	1			46.4	21.9	36	73.6	11	133	119	99.8	173	78.9	33.2	8.6	35.3	287	86.5	48.5	86.7	58.5	53.3	172	58.4	10.7
348	2	1	54	176	77.5	25.0194	1	2			71.2	26.6	36.5	76.8	14.8	142	127	95.7	205	79	43.8	3.44	34.9	403	56.9	46.4	83.2	52	59.7	216	86.8	17.4
349	2	1	56	175	72.5	23.6735	1	1			68.6	17.7	49	84.4	14.5	136	138	120	193	95.1	36.1	17.7	37	309	93.1	41.1	129	129	64	212	92.1	20.4
350	2	1	59	175	63	20.5714	1	1			81.1	28.6	55	109	22.1	257	181	186	232	111	57.6	25.4	59.9	372	118	57.7	139	151	114	283	87.9	18.2
351	2	1	57	172	70	23.6614	2	2			107	46.6	67.1	136	26.8	282	220	190	313	146	80.4	36.4	66.7	528	175	106	162	157	124	330	150	33.2
352	2	1	56	173	85	28.4005	1	1			131	56.2	77.9	140	37.4	261	217	245	415	184	88.8	17.6	60.5	535	182	100	245	156	120	375	156	28.9
353	2	1	64	171	65	22.2291	1	1			98.9	44.1	78.1	134	29.7	278	222	150	299	153	75.4	24.6	33.3	487	155	90	185	169	125	443	125	28.5
354	2	1	54	172	88	29.7458	1	1			91.9	52.5	92.7	164	26.5	258	249	171	295	107	71.6	22.8	84.7	546	179	103	282	167	141	458	132	38.5
355	2	1	59	160	66	25.7812	2	1			120	57.2	110	185	33.4	343	290	180	411	170	84.3	30.5	74.4	600	197	106	265	196	184	577	119	19.2
356	2	1	57	165	58	21.3039	2	1			114	42.9	104	174	41.6	468	273	264	411	167	122	42	169	792	214	115	234	306	171	532	200	51.2
357	2	1	59	172	76	25.6896	2	2			92.8	58.5	92.2	156	36.5	356	258	231	311	189	77.6	30.4	110	702	132	105	210	143	156	440	179	32.3
358	2	2	54	160	87.5	34.1797	2	2			51.8	19.1	52.1	107	27.2	186	192	124	257	135	75.5	32.2	27.3	461	167	44.6	127	115	64	414	79.4	25.1
359	2	2	55	162	41.6	15.8512	2	2			56.9	24.3	62.6	122	29.6	230	234	143	516	223	47.6	37.8	66.9	344	160	32.5	133	112	76.5	392	82.8	25.6
360	2	2	54	167	60	21.5139	1	1			79.3	37.2	93.3	175	47.6	315	266	255	407	256	81.6	32.4	67.1	560	95.8	59.1	291	166	115	772	103	24.8
361	2	1	72	165	69	25.3444	1	1			77.6	37.4	106	197	38	273	328	167	301	206	66.2	38.4	82.9	415	119	57.8	188	122	101	471	94.5	26.7
362	2	1	54	176	70	22.5981	2	2			62.8	31.8	82	168	31.7	239	277	139	370	146	54.3	34.1	80.6	502	101	60.6	151	60.9	91.5	448	104	27.1
363	2	1	60	167	68.8	24.6692	2	1			74	31	94.9	200	33.4	281	311	153	263	184	56.3	35.8	86.1	552	142	64.3	189	111	96.4	467	105	37.6
364	2	1	63	157	55	22.3133	1	1			54.8	32.2	69.4	164	36.8	288	285	187	304	223	60	27.5	65	924	113	32.7	202	82.2	87	414	74.7	29.3
365	2	1	61	170	85	29.4118	1	1			65.7	26.1	89.1	154	33.6	283	264	188	296	193	55	35	65.3	337	121	47.1	253	84.9	71.8	554	61.6	25.4
366	2	1	57	169	63	22.0581	2	1			68.9	34.3	90.7	182	34.4	207	326	149	262	165	53.5	29.4	29.8	437	147	59.2	241	135	88.4	535	77	35.4
367	2	1	63	164	72	26.7698	1	2			131	61.1	133	259	49.2	532	400	263	330	336	85	58	90.3	120	255	106	260	196	146	614	173	59.4
368	2	1	55	174	69	22.7903	1	2			138	70.7	141	246	58	397	379	236	411	267	83.7	47.6	84.7	118	155	98.3	261	242	147	713	123	51.8
369	2	1	56	176	61	19.6927	2	2			103	48.9	142	250	41	502	405	220	422	297	89.4	58.5	107	561	246	88.5	359	226	122	787	167	55.2
370	2	1	63	168	55	19.487	1	1			116	32.9	122	207	85.2	297	284	345	481	397	152	39.4	139	219	134	89.4	339	211	218	639	174	78.1
371	2	1	61	164	65	24.1672	1	2			108	43.6	121	215	50.5	290	371	224	365	241	69.5	49.1	109	109	176	57.2	245	149	121	568	81.3	36.9
372	2	1	57	170	62.5	21.6263	2	2			76.1	25.7	97.8	175	41.2	314	275	236	563	241	66	36.5	67.4	610	106	52.8	202	148	91.3	475	100	56
373	2	2	67	167	60	21.5139	2	2			93.4	42.1	111	216	42.3	383	323	219	300	223	73.5	34	168	618	149	76.1	209	117	103	632	171	42.6
374	2	1	55	162	69	26.2917	2	2			96	57.2	96.4	169	37.2	506	284	218	326	214	77.8	41.5	67.2	908	158	136	230	255	114	524	177	37.2
375	2	1	62	166	63	22.8625	2	2			113	73	71.2	167	37.8	268	301	141	298	157	30.6	32.4	91.9	778	162	118	267	196	123	585	356	40.1
376	2	1	72	178	77	24.3025	2	2			109	65.2	90.9	168	38.4	374	292	179	347	242	49.3	50.8	104	892	144	117	208	193	117	480	302	34.7
377	2	2	61	150	56	24.8889	2	2			92.7	43.4	114	172	30.5	333	318	200	265	161	67.7	32.7	219	615	188	123	251	110	104	521	217	56.7
378	2	2	54	158	58	23.2335	2	2			114	65	79.9	170	41.3	350	275	183	426	216	54.8	34.7	37.5	940	151	120	251	206	133	530	173	41.9
379	2	2	65	159	72	28.4799	2	2			112	61.1	76.5	147	47.3	445	277	219	572	302	84.8	51.9	83.3	979	186	128	236	288	144	592	286	49.9
380	2	2	60	159	56.2	22.2301	2	2			112	70.1	67	172	32.7	325	309	161	538	238	43.5	37.6	39.7	790	170	94.3	203	183	119	487	156	41.6
381	2	2	54	157	55	22.3133	2	2			93.6	63.1	53.1	168	35.1	243	254	136	396	161	45.8	31.7	20.4	703	85.6	81.2	237	187	116	487	93.3	29
382	2	2	59	162	63	24.0055	2	2			106	68.3	64.6	145	28.4	183	264	119	242	176	37.3	24.6	36.6	475	121	59.9	184	120	102	388	98.7	20
383	2	1	58	177	77	24.5779	2	2			90.4	57	84.9	187	37.9	263	327	167	226	180	59.4	24	122	569	109	110	225	157	127	523	122	39
384	2	1	66	167	50	17.9282	2	2			98.7	82.8	63.8	166	19.8	130	260	101	289	134	34	25.2	18.5	409	102	55.3	137	72.8	163	398	162	24.7
385	2	1	59	171	69	23.597	2	2			126	77.5	98.8	233	34.2	289	340	129	275	169	45.8	43	71.3	635	136	96.9	275	179	155	582	132	24.2
386	2	1	56	175	80	26.1224	1	2			62.3	54.4	67	152	19.2	148	237	135	264	113	41.3	2.3	71.4	513	118	74.7	210	60.1	101	305	153	22
387	2	1	58	168	65	23.03	2	2			150	84.8	123	298	29.4	296	424	140	339	187	40.7	27.2	28.1	450	176	88	492	150	141	568	139	28.5
388	2	1	57	168	68	24.093	2	2			152	108	134	238	35.5	237	351	179	429	184	65.8	40	86.8	767	133	113	361	221	164	524	174	82
389	2	1	60	165	55	20.202	2	2			80.6	80	72.9	181	27.2	166	246	123	228	164	39.4	22.5	91.9	552	90.2	67.2	215	101	116	453	115	28.1
390	2	1	68	165	65	23.8751	1	1			58.9	42.6	56.3	135	28.6	187	245	130	260	122	43.3	3.29	127	548	85.4	75.3	300	91.5	75.2	353	115	37.3
391	2	2	61	154	53	22.3478	2	2			154	76	88.9	269	32.8	245	262	194	362	254	60.8	51.1	53.2	738	142	109	218	237	125	529	169	53.3
392	2	2	64	168	56.9	20.1601	2	2			81.6	42.2	43.2	90.6	26.7	155	196	124	324	176	41.6	29.2	55.8	514	103	63.5	176	136	84.5	344	73	26.2
393	2	1	59	160	65	25.3906	1	2			82.8	41.6	61.2	120	32.2	210	223	181	339	179	62.5	20.5	54.6	759	74.2	86.4	226	92.4	121	451	112	36.2
394	2	1	58	166	70	25.4028	2	2			126	100	123	271	49.2	298	457	215	458	199	79	33.3	57.5	1100	160	138	480	139	150	770	162	59.4
395	2	1	59	174	77	25.4327	1	2			102	77.7	86.4	201	38.1	317	314	200	301	156	67.8	37.9	75.5	705	125	95.5	280	130	128	600	101	30.7
396	2	2	54	160	56	21.875	2	2			80.9	32.5	63.8	143	23.8	202	235	108	321	173	47.3	34.6	33.2	778	95.4	91.4	129	151	65.7	336	69.7	31.6
397	2	2	54	162	59	22.4813	2	2			85.1	44.2	61	137	25.3	177	261	117	361	169	41	29	33	588	89.7	77.5	186	126	89.8	379	77	25.4
398	2	2	80	154	53	22.3478	2	2			142	55	82.7	184	30.3	262	278	128	347	216	52	39.3	104	616	140	81.8	185	161	110	517	135	33.6
399	2	2	54	163	60	22.5827	2	2			93.1	40.1	71.6	151	31	195	276	180	438	217	44.3	31.6	49.8	687	99.4	53.8	267	138	114	562	81.3	32.1
400	2	2	54	157	60	24.3418	2	1			94.2	43.7	58.8	124	30.3	268	251	154	543	179	47.9	32.9	39.1	662	92.6	87.6	221	132	90.6	393	72.7	44.1
401	2	2	56	160	57	22.2656	2	2			96.5	50	63.3	135	24.1	185	257	134	330	160	40.3	31.4	20.8	593	129	74.3	147	152	91.1	409	69.2	38.3
402	2	2	57	165	64	23.5078	2	2			88.3	58.4	82	178	29.2	186	271	155	305	172	22	46.1	61.1	564	112	60.2	193	107	105	402	111	23.9
